# Supplementary material for: Development and validation of a machine learning model to predict mortality risk in patients with COVID-19
Source: PubMed Central journal article supplement — BMJ Health Care Inform. 2021 May 7;28(1):e100235. doi: 10.1136/bmjhci-2020-100235 (PMC8108129; doi:10.1136/bmjhci-2020-100235), 2021-05-07
Supplement: bmjhci-2020-100235supp001.pdf [file bmjhci-2020-100235supp001.pdf]

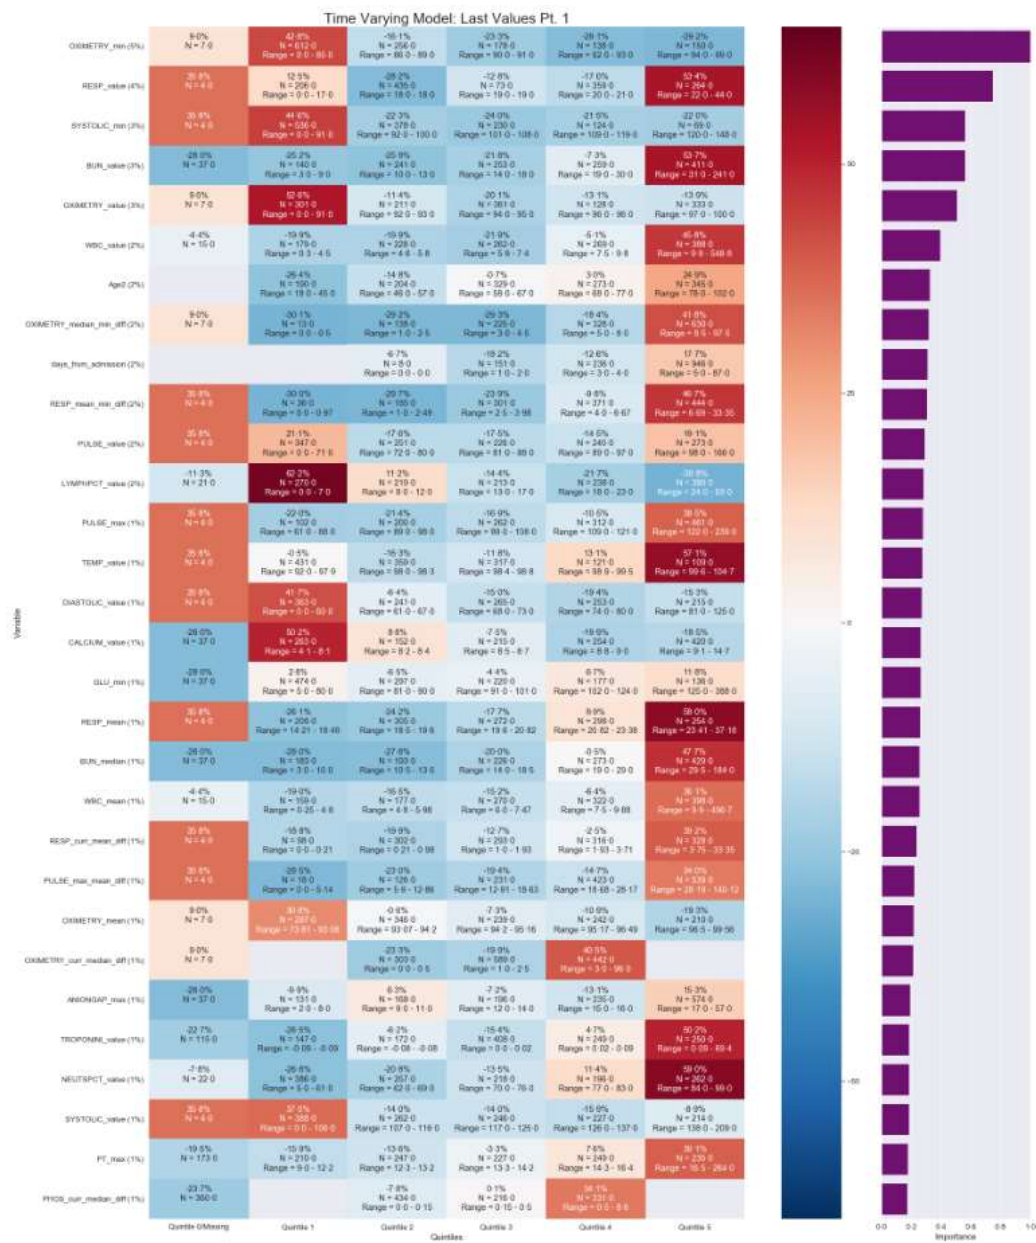

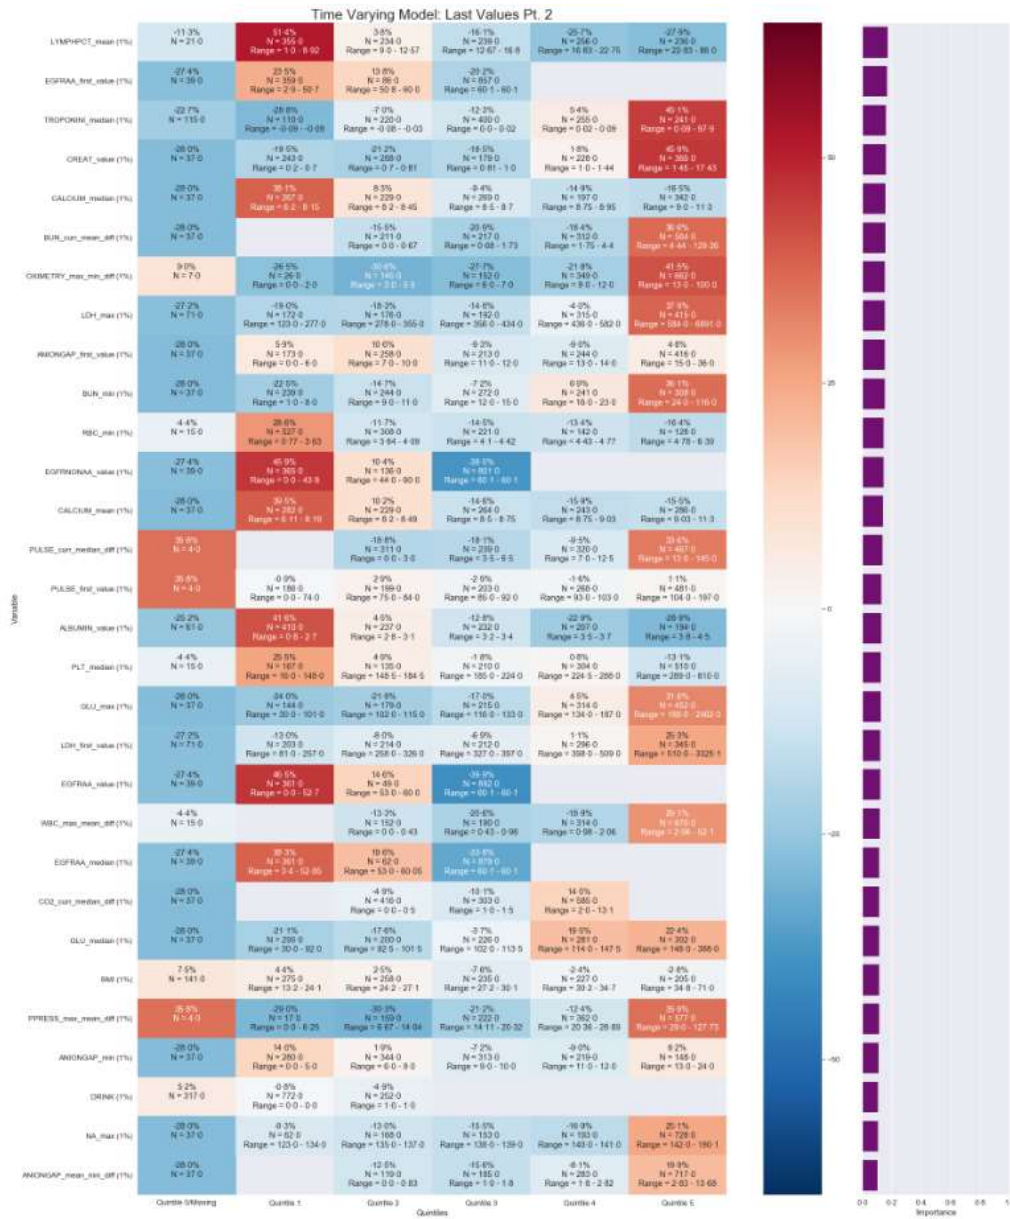

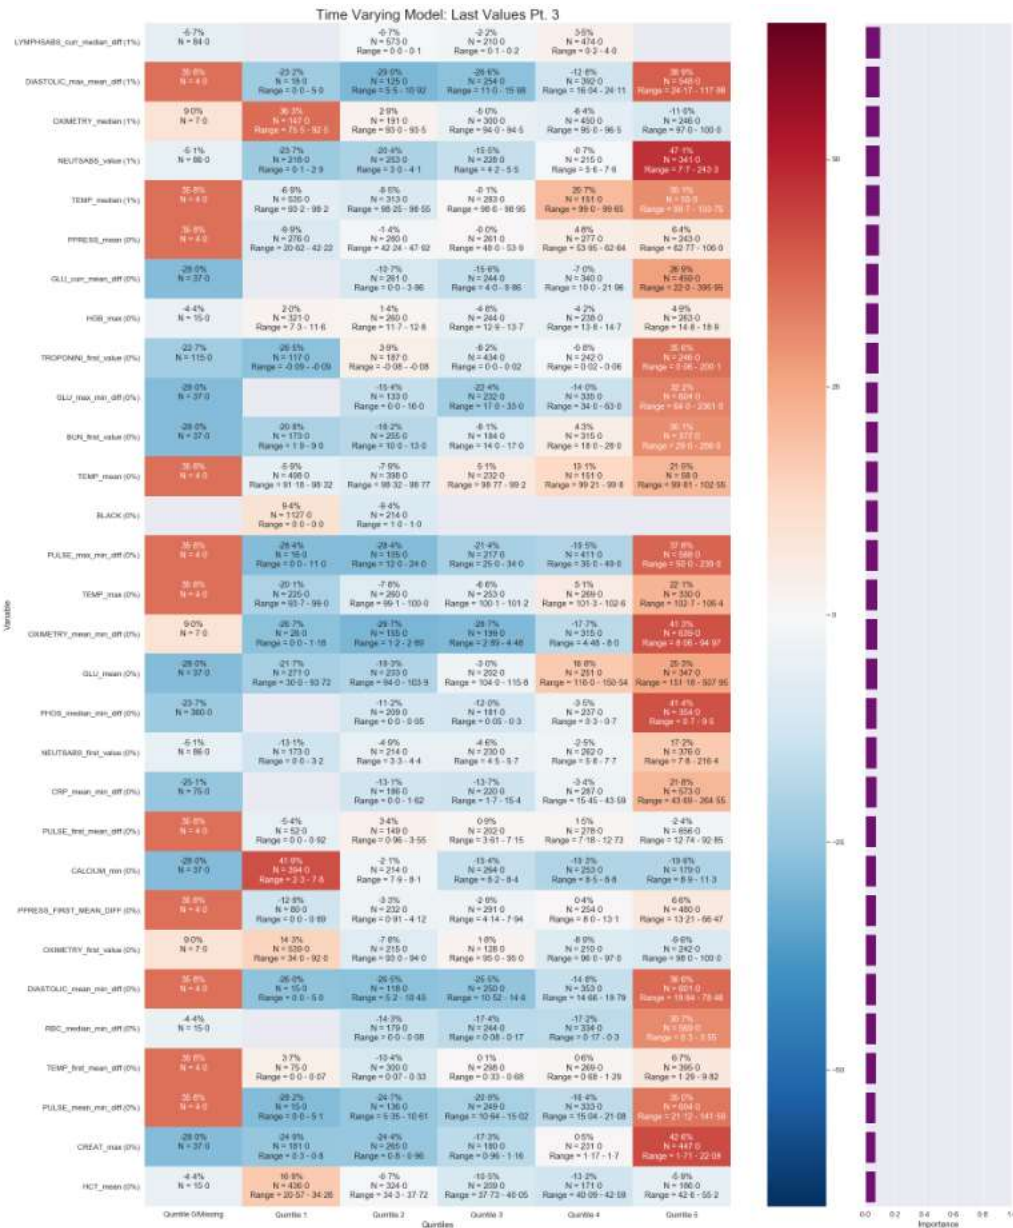



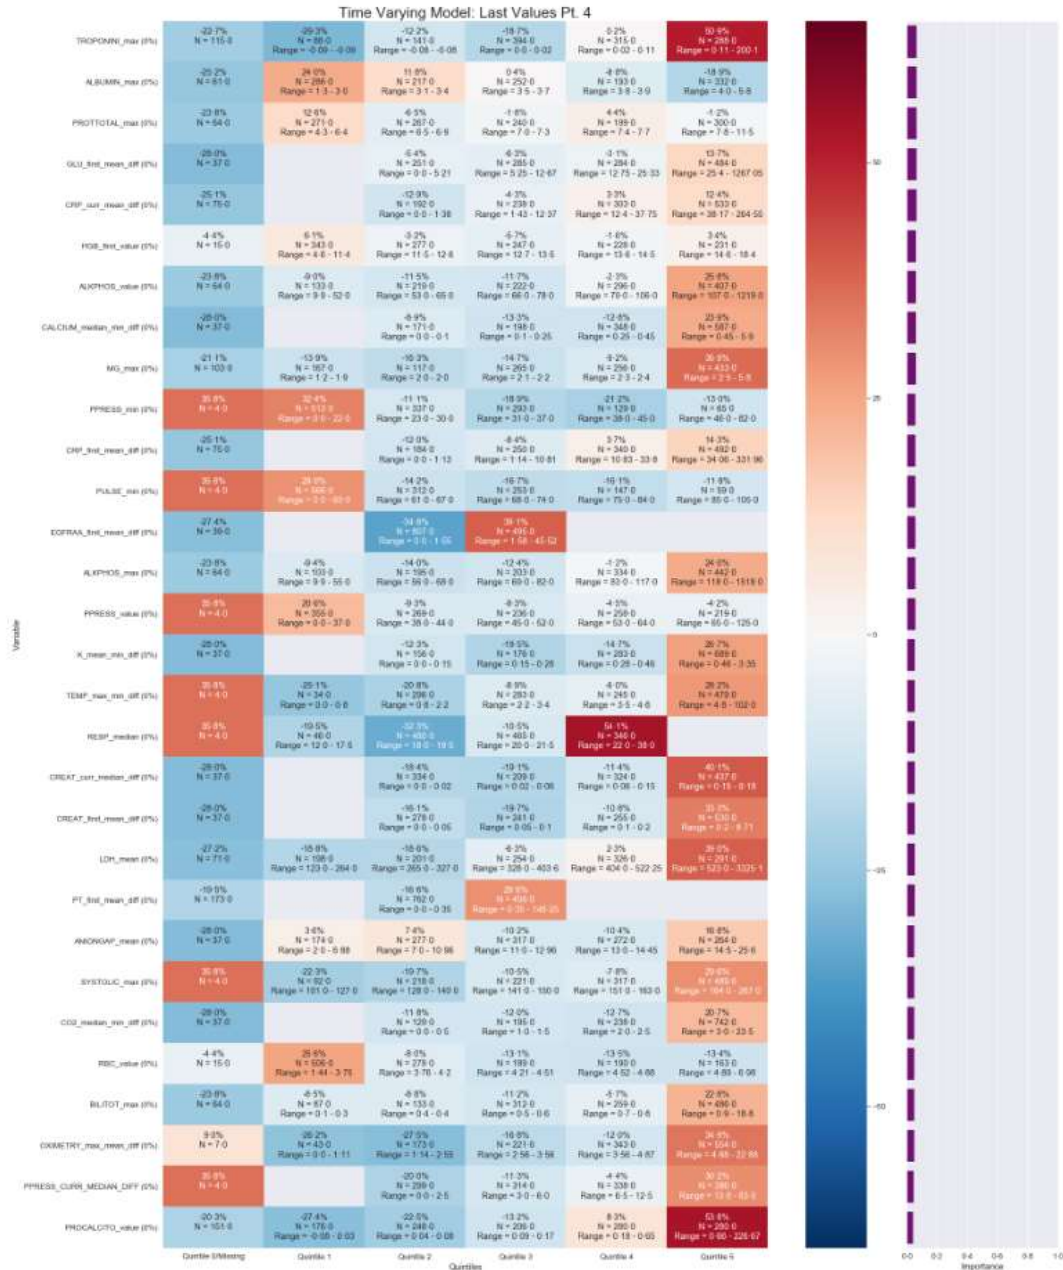

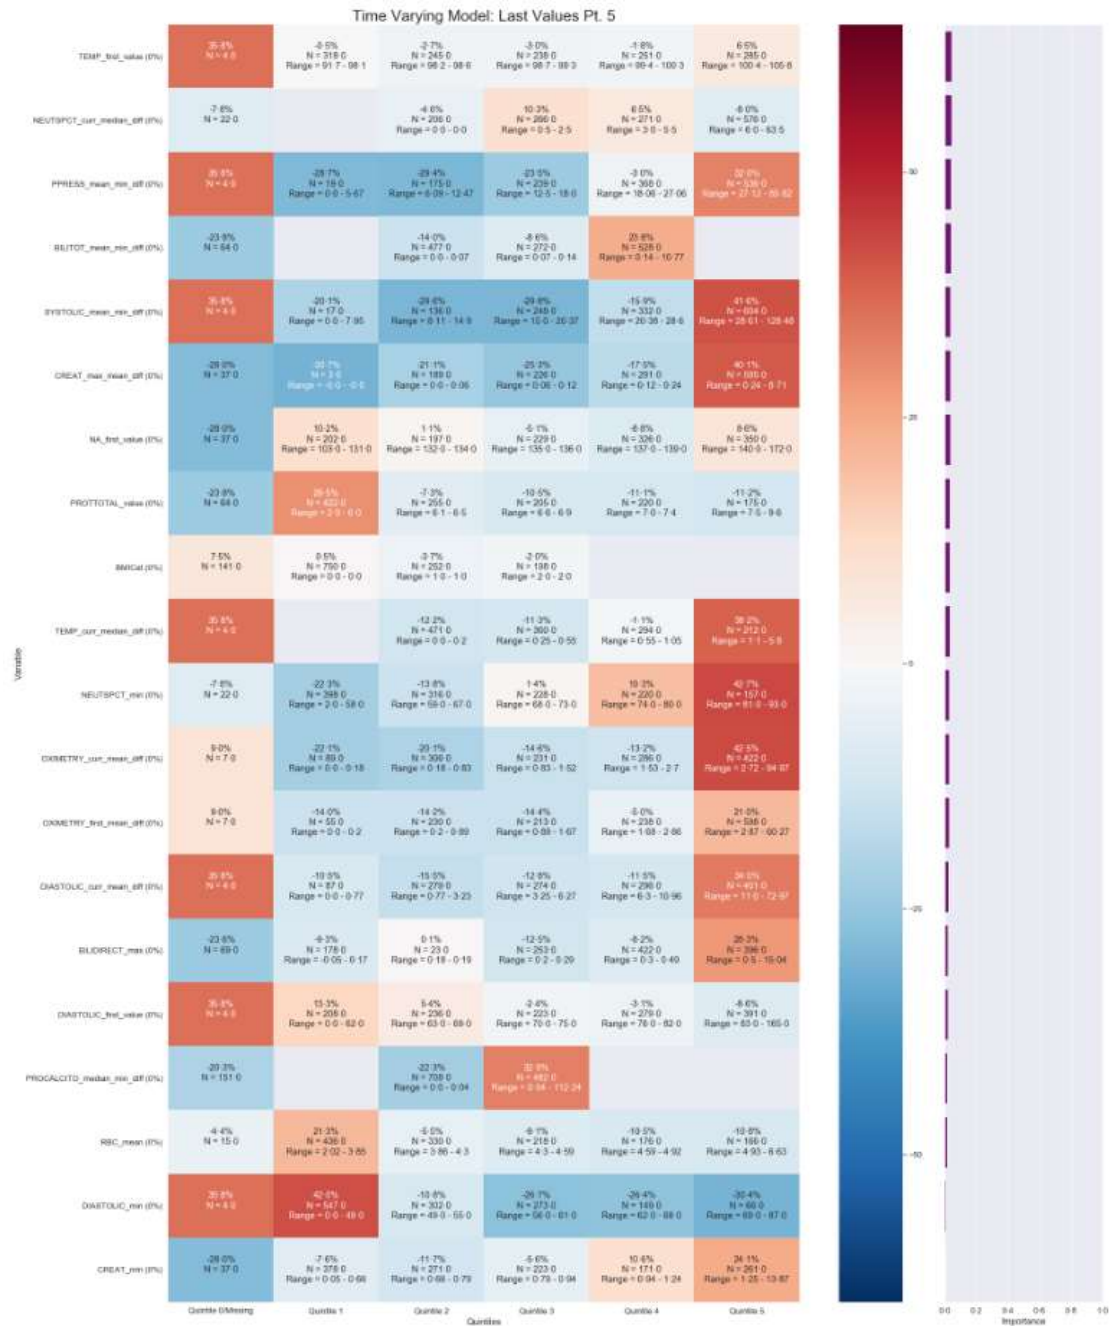

Figure 3. Supplemental Map. Ranking of most important 30 of 142 features of the final selected model based on percent relative importance in the test set. The purple graph on right most column of figure displays the variable importance value. The map also lists the average influence of a feature’s level on a patient’s overall prediction score

with darker red boxes and darker blue boxes indicating an increase and decrease in the prediction, respectively. (N = 864)
